# Supplementary material
Source: PubMed Central journal article supplement (PMC6129250)
Supplement: 12264_2018_235_MOESM1_ESM.pdf [file 12264_2018_235_MOESM1_ESM.pdf]

## Supplementary Materials

### *SIRT1* rs3758391 and major depressive disorder: new data and meta-analysis

Wei Tang<sup>1</sup>, Yan Chen<sup>2</sup>, Xinyu Fang<sup>2</sup>, Yewei Wang<sup>2</sup>, Weixing Fan<sup>3</sup>, Chen Zhang<sup>2,\*</sup>

<sup>1</sup> Department of Psychiatry, Wenzhou Kangning Hospital, Wenzhou Medical University, Wenzhou 325000, China

<sup>2</sup> Department of Biochemistry, Shanghai Mental Health Center, Shanghai Jiao Tong University School of Medicine, Shanghai 200030, China

<sup>3</sup> Department of Psychiatry, Jinhua Second Hospital, Jinhua 321016, China

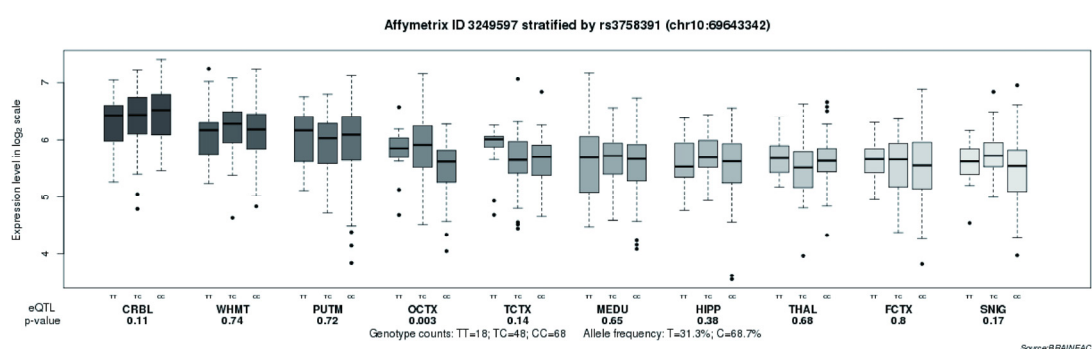

**Fig. S1 Association of rs3758391 with *SIRT1* mRNA expression levels in ten brain regions (Affymetrix ID 3249597).** Data were extracted from the BRAINEAC database (<http://caprica.genetics.kcl.ac.uk/BRAINEAC/>). SNIG, substantia nigra; PUTM, putamen (at the level of the anterior commissure); MEDU, inferior olivary nucleus (sub-dissected from the medulla); THAL, thalamus (at the level of the lateral geniculate nucleus); OCTX, occipital cortex; HIPP, hippocampus; FCTX, frontal cortex; TCTX, temporal cortex; WHMT, intralobular white matter; CRBL, cerebellar cortex.

**Table S1. Estimate of linkage disequilibrium statistics between rs12415800 and rs375891 polymorphisms**

| SNP        | rs12415800         | rs375891 |
|------------|--------------------|----------|
| rs12415800 | -                  | 0.818*   |
| rs375891   | 0.098 <sup>#</sup> | -        |

\*  $D'$  value, <sup>#</sup>  $r^2$  value.

**Table S2. Summary of case-control studies (up to March 2018) between rs3758391 of *SIRT1* and MDD**

| Study                              | Year | Allele | <i>N</i> | Ethnicity | OR/beta | 95% CI    | <i>P</i> |
|------------------------------------|------|--------|----------|-----------|---------|-----------|----------|
| PGC <sup>1</sup>                   | 2012 | T      | 18759    | European  | 1.05    | 1.01-1.10 | 0.02     |
| Kovanen <i>et al.</i> <sup>2</sup> | 2015 | T      | 3911     | Finnish   | 1.19    | 1.01-1.40 | 0.04     |
| Our study reported here            | 2018 | T      | 1413     | Chinese   | 0.78    | 0.64-0.94 | 0.01     |

PGC, Psychiatric Genomics Consortium

### References

1. Ripke S, Wray NR, Lewis CM, Hamilton SP, Weissman MM, Breen G, *et al.* A mega-analysis of genome-wide association studies for major depressive disorder. *Mol. Psychiatry* 2013, 18: 497-511.
2. Kovanen L, Donner K, Partonen T. SIRT1 polymorphisms associate with seasonal weight variation, depressive disorders, and diastolic blood pressure in the general population. *PLoS One* 2015, 10: e0141001.
